# Supplementary material for: Detrended fluctuation analysis of gait dynamics when entraining to music and metronomes at different tempi in persons with multiple sclerosis
Source: PubMed Central journal article supplement (PMC7395137; doi:10.1038/s41598-020-69667-8), 2020-07-31

**Title**

Detrended fluctuation analysis of gait dynamics when entraining to music and metronomes at different tempi in persons with multiple sclerosis

**Authors**

Lousin Moumdjian<sup>1,2\*</sup>, Pieter-Jan Maes<sup>1</sup>, Simone Dalla Bella<sup>3,4</sup>, Leslie M. Decker<sup>5</sup>, Bart Moens<sup>1</sup>, Peter Feys<sup>2</sup>, Marc Leman<sup>1</sup>

**Affiliations**

<sup>1</sup>IPEM Institute of Psychoacoustics and Electronic Music, Faculty of Arts and Philosophy, Ghent University, Gent, Belgium

<sup>2</sup>REVAL Rehabilitation Research Center, Faculty of Rehabilitation Sciences, BIOMED, Hasselt University, Hasselt, Belgium

<sup>3</sup>International Laboratory for Brain, Music and Sound Research (BRAMS), Montreal, Canada

<sup>4</sup>Department of Psychology, University of Montreal, Montreal, Canada

<sup>5</sup>Normandie Univ, UNICAEN, INSERM, COMETE, GIP CYCERON, Caen, France.

\*Corresponding author

Contact information: [Lousin.moumdjian@ugent.be](mailto:Lousin.moumdjian@ugent.be); [lousin.moumdjian@uhasselt.be](mailto:lousin.moumdjian@uhasselt.be)

Supplementary Figure 1. Coefficient of variation and standard deviation of the inter beat interval time series for the six different music genres and metronome.

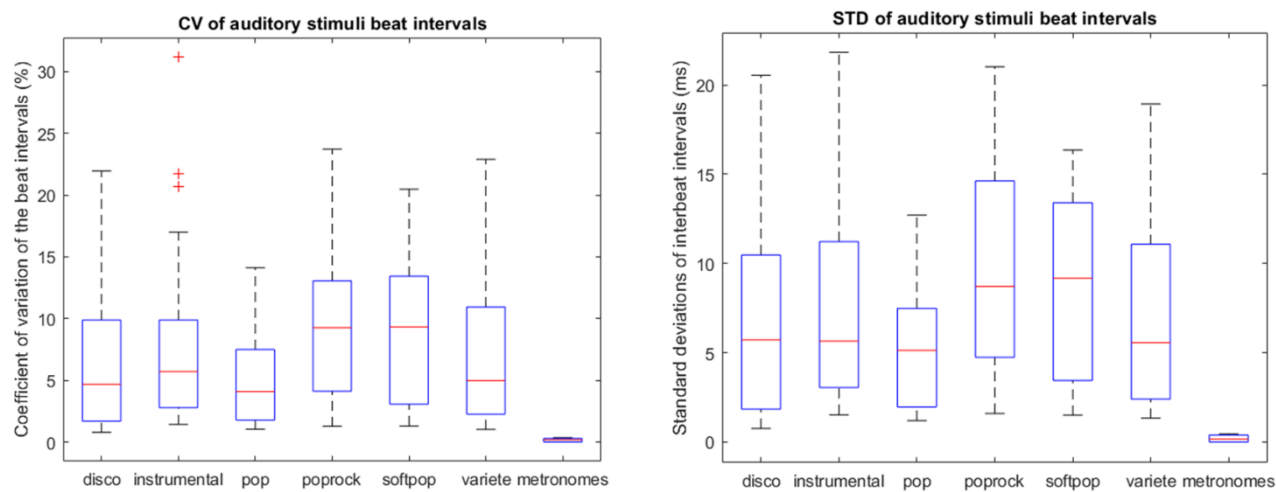

Supplementary Figure 2. DFA exponent ( $\alpha$ ) of the original and surrogate inter-step-intervals time series. The data is visualized in three different ways. A: scatter plot illustrating the distribution of alpha per participant collapsed per stimuli, in the original and surrogate time series. B: scatter plot illustrating the distribution of alpha per participant per experimental condition and per stimuli, in the original time series and surrogate time series. C: bar plots, illustrating the distribution of alpha per tempi and per stimuli, in the original and surrogate time series (mean and standard errors of mean are shown).

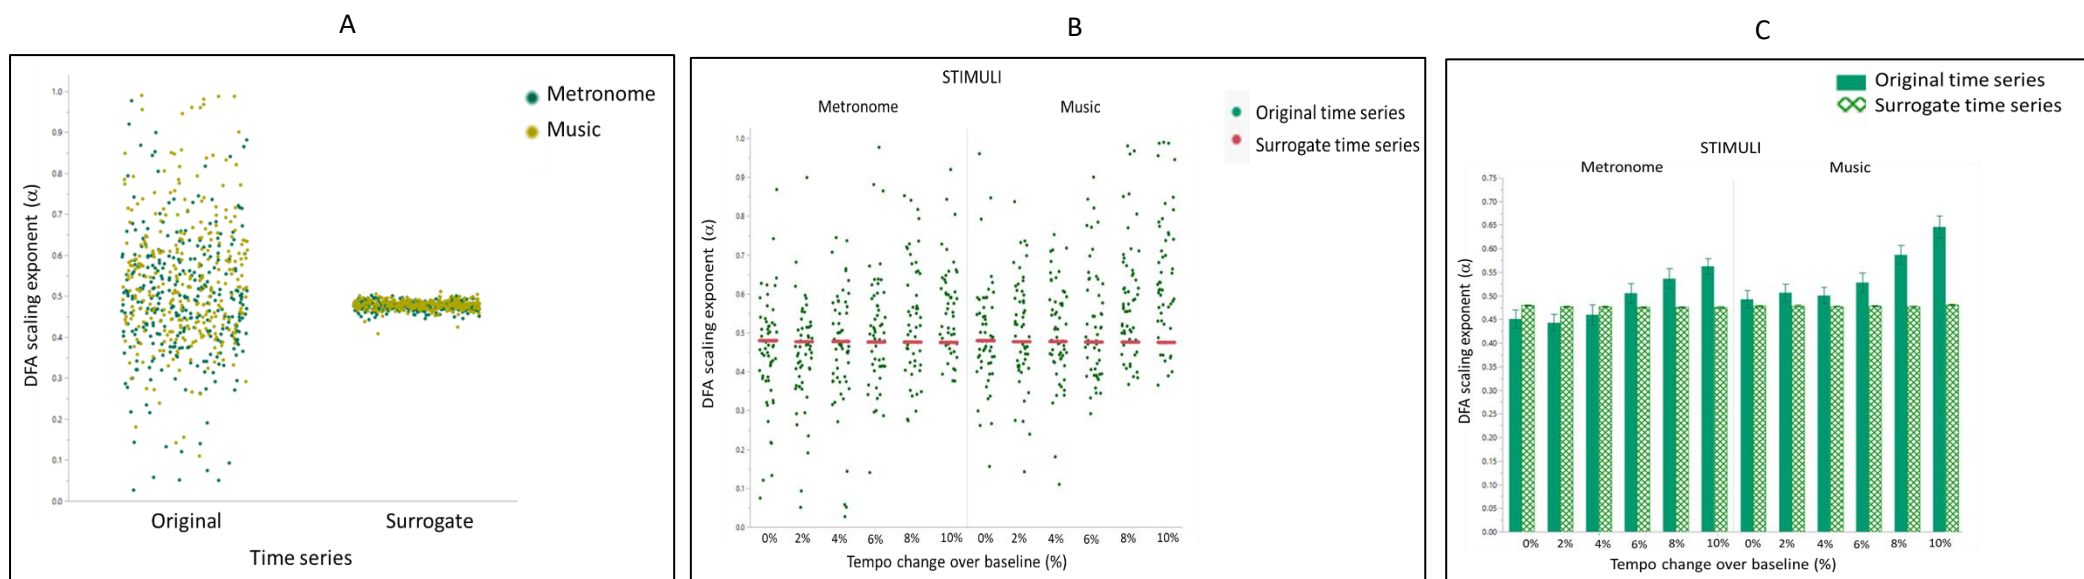

Supplement: 41598_2020_69667_MOESM1_ESM.pdf [file 41598_2020_69667_MOESM1_ESM.pdf]
